# Supplementary material for: Late Pleistocene glacial chronologies and paleoclimate in the northern Rocky Mountains
Source: Copernicus journal article supplement (doi:10.5194/cp-18-293-2022), 2022-02-15
Supplement: Supplementary file 1 [file cp-18-293-2022-supplement.zip]

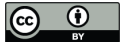

*Supplement of*

**Late Pleistocene glacial chronologies and paleoclimate in the northern Rocky Mountains**

**Brendon J. Quirk et al.**

*Correspondence to:* Brendon J. Quirk ([bjquirk@purdue.edu](mailto:bjquirk@purdue.edu))

- [cp-18-293-2022-supplement-title-page.pdf](#)
- [submitt-supfiles](#)
  - [supplement-figures.docx](#)
  - [supplement-table.xlsx](#)

The copyright of individual parts of the supplement might differ from the article licence.
